# Supplementary material for: Sulfhydryl functionalized carbon quantum dots as a turn-off fluorescent probe for sensitive detection of Hg2+
Source: Royal Society of Chemistry journal article supplement (doi:10.1039/d1ra06527k), 2021-01-01
Supplement: d1ra06527k1.pdf [file d1ra06527k1.pdf]

## Sulfhydryl functionalized carbon quantum dots as a turn-off fluorescent probe for sensitive detection of Hg<sup>2+</sup>

Wei Yao<sup>1</sup>, Yingchen Hua<sup>2</sup>, Zhihong Yan<sup>1</sup>, Chunxian Wu<sup>2\*</sup>, Feiyan Zhou<sup>3\*</sup>, Yi Liu<sup>1,2,3\*</sup>  
<sup>1</sup>College of Pharmacy, Guangdong Pharmaceutical University, Guangzhou 510000, China  
<sup>2</sup>School of pharmaceutical and chemical engineering, Guangdong Pharmaceutical University, Zhongshan 528400, China  
<sup>3</sup>Guangzhou Baiyunshan Weiyi Industrial Co., Ltd, Guangzhou 510000, China  
\*The first corresponding author: E-mail: Liuyi915@126.com.

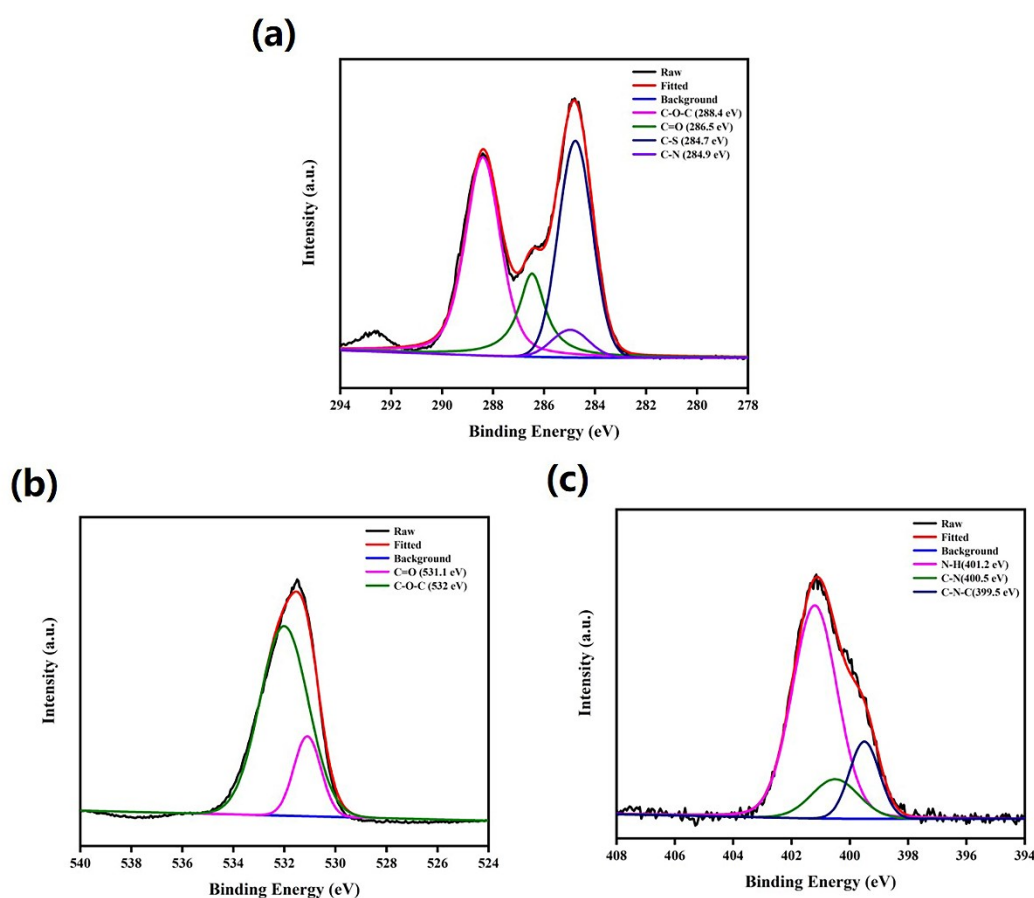

**Fig S1.** High resolution XPS spectra of (a) C1s, (b) O1s, (c) N1s of HS-CQDs.

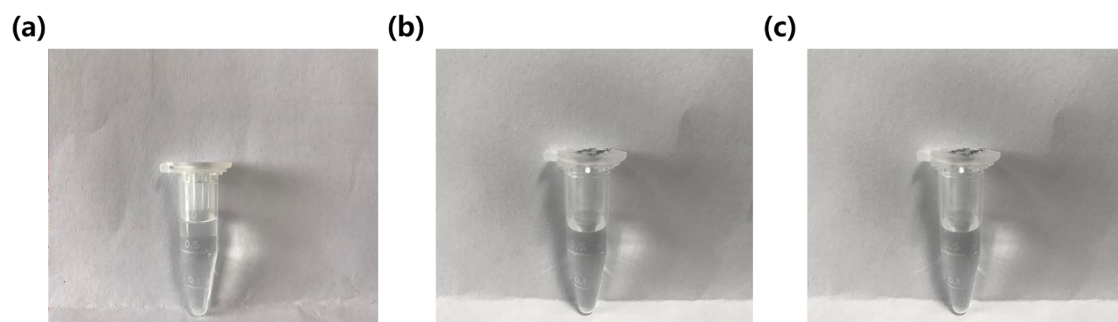

**Fig S2.** Images of HS-CQDs solutions(1mg/mL) placed for 0h (a), 8h (b) and 24h (c).

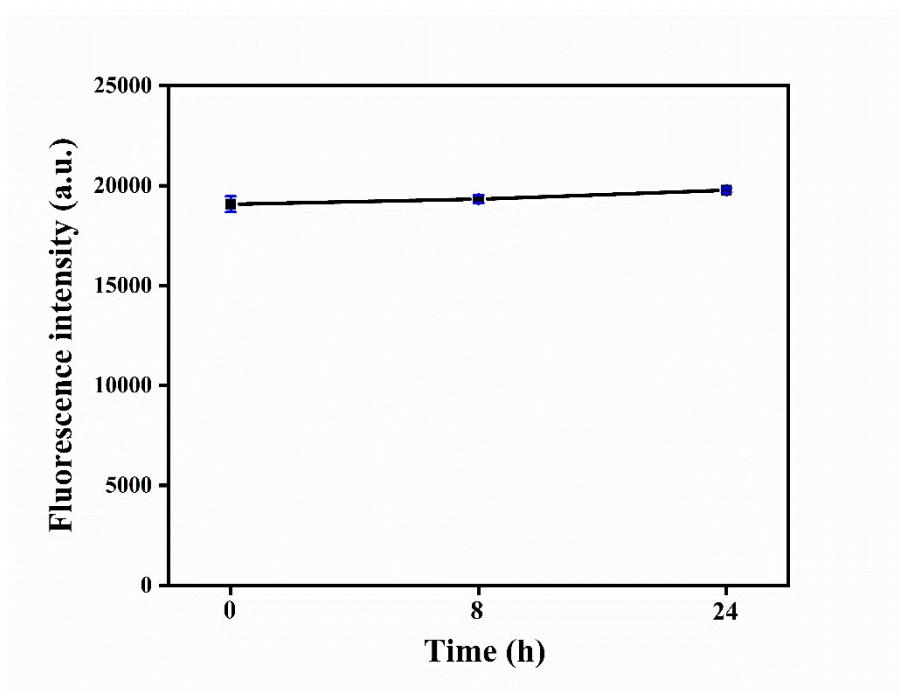

**Fig S3.** Fluorescence spectra of HS-CQDs solutions (25  $\mu\text{g/mL}$ ) placed for 0h, 1h and 2h.  $\lambda_{\text{ex}}=350\text{nm}$ .

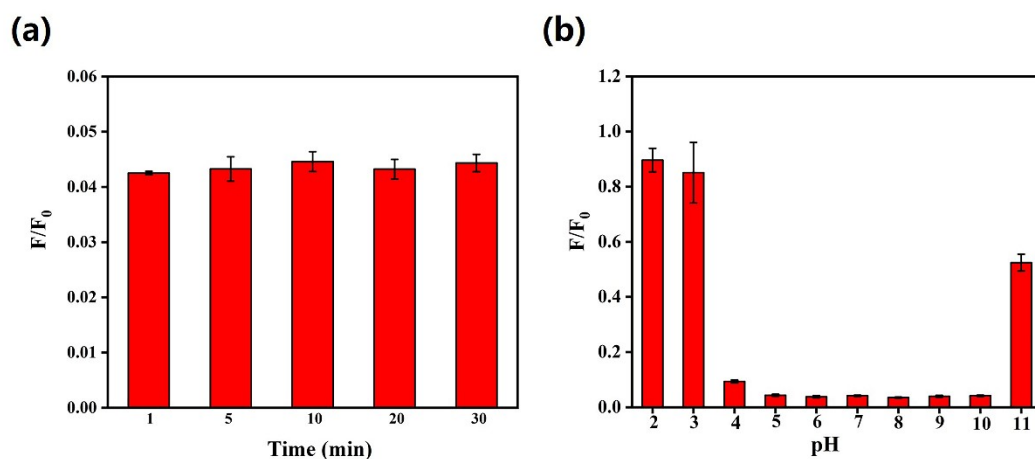

**Fig S4.** Effect of (a) reaction time (1~5min) and (b) pH value (2~11) on the detection of  $\text{Hg}^{2+}$ (10 $\mu\text{M}$ ) by HS-CQDs(25  $\mu\text{g/mL}$ ).  $\lambda_{\text{ex}}=350\text{nm}$ .

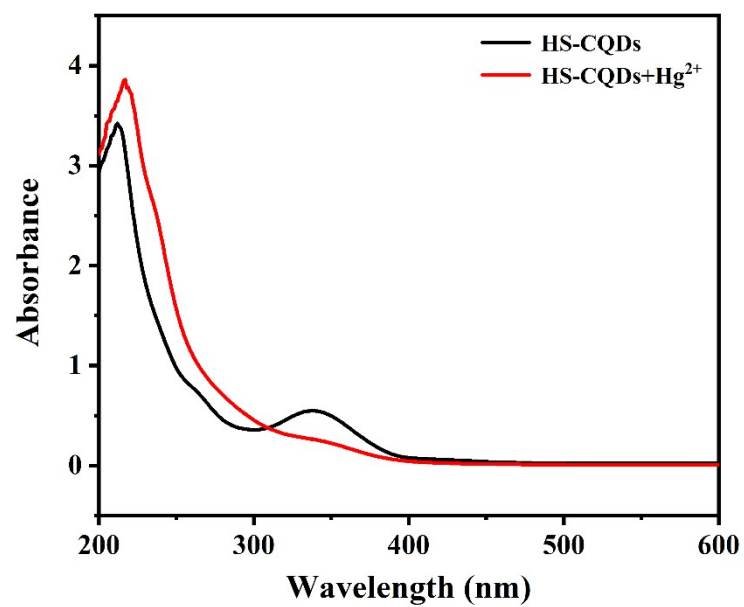

**Fig S5.** UV-Vis spectra for the HS-CQDs (100  $\mu\text{g}/\text{mL}$ ) with or without  $\text{Hg}^{2+}$  (50  $\mu\text{M}$ ).
